# Supplementary material
Source: Springer Nature journal article supplement (https://www.springermedizin.de/resource/supplementary/13569_2014_59_MOESM1_ESM.pdf/9676738)
Supplement: MOESM1 [file 9676738]

106 potential relevant reports identified  
after initial search

|    |                    |
|----|--------------------|
| 62 | PubMed             |
| 35 | Clinicaltrials.gov |
| 4  | Cochrane library   |
| 5  | ASCO abstracts     |

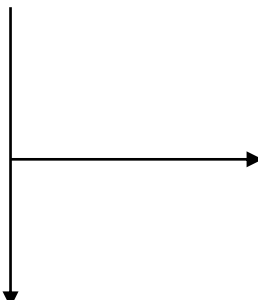

70 Reports excluded on the basis of  
abstract, title or no results published

36 Reports retrieved in full  
text

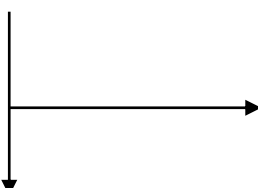

6 Reports excluded on the basis of full  
text search

30 Reports included in the  
analysis
